# Supplementary material
Source: publisher site journal article supplement (https://www.spandidos-publications.com/7457/downloadSupplementary)
Supplement: Supplementary file 1 [file downloadSupplementary]

**Table SI.** Primers used for pedigree and minigene analyses.

| Primer ID                                  | Sequence (5' to 3')                     |
|--------------------------------------------|-----------------------------------------|
| Pedigree analysis                          |                                         |
| <i>DNAH9</i> -3743+1-F                     | GCACCTTGGGAATCTGACCA                    |
| <i>DNAH9</i> -3743+1-R                     | CCACGTTTCAACCAAAGGTCC                   |
| <i>DNAH9</i> -11176-F                      | TGGGCTGGAAAACATCACATT                   |
| <i>DNAH9</i> -11176-R                      | TAAGTGGGAAATGGTGGGGG                    |
| Minigene plasmid construction <sup>a</sup> |                                         |
| <i>DNAH9</i> -Exon18-F                     | tggccatggaggcccgaattCTTGGCCAACCTGGATGCG |
| <i>DNAH9</i> -Intron19-R                   | gggcaattcaagatgctcTAGATATATATGCATCTTTTT |
| <i>DNAH9</i> -Intron19-F                   | gaagcatcttgaattgccTTCTTCCAATG           |
| <i>DNAH9</i> -Exon20-R                     | gcggccgcggtacctcgagaCTGGGGTAGCTGTGCCCG  |
| Minigene assay                             |                                         |
| <i>DNAH9</i> -MG-test-F                    | GGCCAACCTGGATGCGTTTA                    |
| <i>DNAH9</i> -MG-test-R                    | CAGACCTCCTTCCTGCACTG                    |

<sup>a</sup>Exon 18 + intron 18-19 + exon 19 + intron 19-20 + exon 20; lowercase letters represent the homologous arms, where the lowercase letters in the *DNAH9*-Exon18-F and *DNAH9*-Exon20-R primers indicate sequences complementary to the vector. Since the sequence of intron 19 of *DNAH9* is too long, it was divided into two segments for cloning, and the sequences of the first 250 bp and the last 250 bp of intron 19 were retained, respectively. The underlined lowercase and uppercase letters in the *DNAH9*-Intron19-R primer represent the terminal sequence of the first *DNAH9* cloning fragment, while the underlined lowercase and uppercase letters in the *DNAH9*-Intron19-F primer represent the beginning sequence of the second cloning fragment. *DNAH9*, dynein axonemal heavy chain 9; F, forward; R, reverse; MG, minigene.

**Table SII.** Frequency and pathogenicity analysis of dynein axonemal heavy chain 9 mutations.

| Mutations   | Frequency |                      |        |        | Pathogenicity score, prediction |                      |                 |                |
|-------------|-----------|----------------------|--------|--------|---------------------------------|----------------------|-----------------|----------------|
|             | 1000 GEA  | ESP6500              | gnomAD | ExAC   | PolyPhen-2                      | MutationTaster       | SIFT            | CADD           |
| c.11176C>T  | 0.0069    | 7.7x10 <sup>-5</sup> | 0.0050 | 0.0055 | 1.000, probably damaging        | 1.0, disease causing | 0.000, damaging | 27.5, damaging |
| c.3743+1G>T | -         | -                    | -      | -      | -                               | 1.0, damaging        | -               | 25.9, damaging |

1000 GEA, 1000 Genomes (East Asian); ESP6500, Exome Sequencing Project 6500; gnomAD, The Genome Aggregation Database (East Asian); ExAC, Exome Aggregation Consortium (East Asian); SIFT, Sorting Intolerant from Tolerant; CADD, Combined Annotation Dependent Depletion.

**Table SIII.** Phenotypes of 24 patients with dynein axonemal heavy chain 9 gene mutations.

| Individual | Phenotypes                                                        | Mutation sites                                                           | (Refs.) |
|------------|-------------------------------------------------------------------|--------------------------------------------------------------------------|---------|
| P1         | Asthenozoospermia                                                 | c.302dupT (p.Leu101fs*47) / c.6956A>G (p.Asp2319Gly)                     | (9)     |
| P2         | Asthenozoospermia                                                 | c.6294T>A (p.Phe2098Leu) / c.10571T>A (p.Leu3524Gln)                     | (9)     |
| P3         | Rhinosinusitis, situs inversus, CHD                               | c.12367G>A (p.Asp4123Asn) homo                                           | (10)    |
| P4         | Rhinosinusitis, situs inversus                                    | c.8708-2A>G (p.Glu2904Aspfs*53) / c.10193G>T (p.Arg3398Leu)              | (10)    |
| P5         | Rhinosinusitis, situs inversus                                    | c.8708-2A>G (p.Glu2904Aspfs*53) / c.10193G>T (p.Arg3398Leu)              | (10)    |
| P6         | Rhinosinusitis, asthenozoospermia, situs inversus                 | c.5641A>G (p.Lys1881Glu) homo / c.8894G>A (p.Arg2965His) homo            | (10)    |
| P7         | Levocardia, SV, MA, DORV, PS, liver/spleen inversion              | c.5308A>T (p.K1770Ter) / c.5381T>C (p.I1794T)                            | (11)    |
| P8         | Dextrocardia, SAV, ASD, TGA, PS                                   | c.4703A>C (p.N1568T) / c.11009A>G (p.E3670G)                             | (11)    |
| P9         | Dextrocardia, PLSVC, TGA, VSD, DORV, PS                           | c.12844-1G>C (splice acceptor) / c.12080A>T (p.H4027L)                   | (11)    |
| P10        | Isolated levocardia, liver/spleen inversion, MA, ASD, SV, TGA, PS | c.302delT (p.F103SfsTer31) / c.5381T>C (p.I1794T)                        | (11)    |
| P11        | TGA, PS, no laterality defects                                    | c.302dupT (p.L104Pfs*45) / c.11176C>T (p.R3726W)                         | (11)    |
| P12        | Laterality defects                                                | c.12914_12919del (p.4305_4307delCCT GGG) / c.7682A>T (p.H2561L)          | (11)    |
| P13        | VSD, PS                                                           | c.4394A>T (p.D1465V) / c.8683C>T (p.L2895F)                              | (11)    |
| P14        | Complete endocardial cushion defect, DORV                         | c.3918G>A (p.Trp1306ter) / c.7150G>A (p.Gly2384Arg)                      | (11)    |
| P15        | SIT                                                               | c.1970+4A>G / c.3354-1G>T                                                | (12)    |
| P16        | SIT                                                               | c.8251C>T (p.Gln2751ter) homo                                            | (12)    |
| P17        | SIT                                                               | c.1027dupT (p.Leu3376Phefs*57) homo                                      | (12)    |
| P18        | Situs ambiguous with CHD (LAI, ACD, IVCI, APVC, PDA)              | c.308dupT (p.Leu104Pfs*45) / c.11666C>G (p.Ser3889ter)                   | (12)    |
| P19        | Heterotaxy                                                        | c.1997G>A (p.Trp666ter) / c.5020G>A (p.Gly1674Arg)                       | (12)    |
| P20        | CHD                                                               | 81-kb deletion at chr17p12 (11,486,795-11,568,385) c.10975C>T (p.Q3659*) | (13)    |
| P21        | Recurrent cough, situs inversus                                   | c.760_761delTT (p.Phe254Leufs*6) c.4331G>A                               | (14)    |
| P22        | Repeated episodes of productive cough                             | c.1298C>G (p.Ser433Cys) / c.5547_5550delTGAC (p.asp1850fs)               | (15)    |
| P23        | Primary ciliary dyskinesia, jejunal atresia                       | c.7150G>A (p.Gly2384Arg) / c.11086C>T (p.His3696Tyr)                     | (16)    |
| P24        | Heterotaxy of abdominal organs, intrauterine fetal death          | c.12775T>C (p.Cys4259Arg) / RSPH1, c.121G>A (p.G41R)                     | (17)    |

ACD, atrioventricular canal defect; APVC, anomalous pulmonary vein connection; ASD, atrioventricular septal defect; CHD, congenital heart disease; DORV, double outlet right ventricle; IVCI, interrupted vena cava inferior; LAI, left atrial isomerism; MA, mitral atresia; PDA, persistent ductus arteriosus; PLSVC, persistent left superior vena cava; PS, pulmonary stenosis; SAV, single atrium and ventricle; SIT, situs inversus totalis; SV, single ventricle; TGA, transposition of the great arteries; VSD, ventricular septal defect.
